# Supplementary material for: Adsorption of TCNQH-functionalized quinonoid zwitterions on gold and graphene: evidence for dominant intermolecular interactions
Source: Royal Society of Chemistry journal article supplement (doi:10.1039/c3ra40930a), 2013-01-01
Supplement: c3ra40930a.pdf [file c3ra40930a.pdf]

## Adsorption of TCNQH-functionalized quinonoid zwitterions on gold and graphene: evidence for dominant intermolecular interactions

Lingmei Kong, Lucie Routaboul, Pierre Braunstein, Hong-Gi Park, Jaewu Choi, John P. Colón Córdova, E. Vega, Luis G. Rosa, Bernard Doudine and Peter A. Dowben

The orbital energies with respect to the vacuum level using the semi-empirical PM3 model for

a) methoxybenzyl-functionalized zwitterion  $C_6H_2(\dots NHR)_2(\dots O)_2$ , where  $R = -CH_2-C_6H_4-OCH_3$ :

-0.38799 LUMO (+2)  
-0.46374 LUMO (+1)  
-2.11035 LUMO (0)  
-7.57282 HOMO (0)  
-9.01096 HOMO (-1)  
-9.10518 HOMO (-2)

b) TCNQH-functionalization ( $TCNQH = (NC)_2CC_6H_4CH(CN)_2$ ) of (6Z)-4-(butylamino)-6-(butyliminio)-3-oxocyclohexa-1,4-dien-1-olate  $C_6H_2(\dots NHR)_2(\dots O)_2$  (where  $R = n-C_4H_9$ ):

-0.54888 LUMO (+2)  
-0.73256 LUMO (+1)  
-3.736 LUMO (0)  
-8.60307 HOMO (0)  
-9.53232 HOMO (-1)  
-9.65609 HOMO (-2)
